# Supplementary material
Source: PubMed Central journal article supplement (PMC2042210)
Supplement: pnas_0707853104_1.pdf [file pnas_0707853104_1.pdf]

**Table 1. Passive parameters for the L2/3 neuron models**

|                                             | <b>Cell 111200A</b> | <b>Cell 141200B</b> | <b>Cell 141200C</b> | <b>Average</b> |
|---------------------------------------------|---------------------|---------------------|---------------------|----------------|
| $E_{rest}$                                  | -75 mV              | -75 mV              | -75 mV              | -75 mV         |
| $R_m$ (range)<br>$\Omega \cdot \text{cm}^2$ | 11,900-15,000       | 16,400-19,300       | 14,300–16,950       |                |
| $R_m$ (model)<br>$\Omega \cdot \text{cm}^2$ | 14,000              | 18,500              | 16,500              | 16,333         |
| $C_m$ (range)<br>$\mu\text{F}/\text{cm}^2$  | 0.83–1.05           | 0.73-0.86           | 0.75-0.89           |                |
| $C_m$ (model)<br>$\mu\text{F}/\text{cm}^2$  | 0.89                | 0.76                | 0.76                | 0.8            |

$E_{rest}$ , the resting potential;  $R_m$  (range), the specific membrane resistivity, and  $C_m$  (range), the specific membrane capacitance, are the values that agree with the experimental input resistance and the measured membrane time constant, assuming that the specific axial resistivity,  $R_i$ , may range between 100 and 300  $\Omega \cdot \text{cm}$ . For the model used,  $R_i$  was eventually fixed at 150  $\Omega \cdot \text{cm}$ , and this determined uniquely the values for  $R_m$  and  $C_m$  used for the model.
