# Supplementary material
Source: PubMed Central journal article supplement (PMC2042210)
Supplement: pnas_0707853104_3.pdf [file pnas_0707853104_3.pdf]

**Table 3. Model parameters for excitable ion channels**

| Channel   | $g_i$ (s/cm <sup>2</sup> ) |                            | Gate | $X_\infty$ ( $x = m, n, h$ )         | $\tau_i$ (ms)                                                                                                                       | $p$ |
|-----------|----------------------------|----------------------------|------|--------------------------------------|-------------------------------------------------------------------------------------------------------------------------------------|-----|
| $I_{Na}$  | Soma                       | 0.178                      | $m$  | $(1 + \exp^{-(V+17)/11})^{-1}$       | 0.05                                                                                                                                | 2   |
|           | Dendrite                   | 0.0017                     | $h$  | $(1 + \exp^{(V+23)/11.5})^{-1}$      | 0.5                                                                                                                                 | 1   |
| $I_{Kd}$  | Soma                       | 0.154                      | $n$  | $(1 + \exp^{-(V+17)/13.6})^{-1}$     | 2                                                                                                                                   | 2   |
| $I_{Nap}$ | Soma                       | 0.0006                     | $n$  | $(1 + \exp^{-(V+50)/6})^{-1}$        |                                                                                                                                     | 1   |
| $I_A$     | Dendrite                   | 0.001*<br>x/100<br>$\mu$ m | $m$  | $(1 + \exp^{-(V+40)/8.5})^{-1}$      | $\frac{1}{\frac{\exp\left(\frac{(V+36)}{20}\right) + \exp\left(-\frac{(V+80)}{13}\right) + 0.37}{3^{((\text{cellious}-23.5)/10)}}}$ | 4   |
|           |                            |                            | $h$  | $(1 + \exp^{(V+49)/6})^{-1}$         | $\frac{1}{\frac{\exp\left(\frac{(V+46)}{5}\right) + \exp\left(-\frac{(V+238)}{37}\right)}{3^{((\text{cellious}-23.5)/10)}}}$        | 1   |
| $I_{AHP}$ | Dendrite                   | 0.045                      | $m$  | $\frac{[Ca^{+2}]}{[Ca^{+2}] + 0.04}$ | 1                                                                                                                                   | 2   |
| $I_L$     | Dendrite                   | 0.0044                     | $m$  | $(1 + \exp^{-(V-8)/10})^{-1}$        | 2                                                                                                                                   | 2   |

Hodgkin and Huxley (3) formalism was used to describe the current flow through an excitable channel. Namely,  $I_i = g_i \cdot m^p \cdot h \cdot (V - E_i)$ , where  $V$ , membrane potential;  $g_i$ , maximal conductance;  $m$  and  $h$ , the activating and inactivating variable, respectively; and  $\tau_i$ , the state variables time constant. For simplicity, the time constant for activation/inactivation of all channels is constant, except for the A-type ion channel.  $p$  is the power of the activation function.  $X_\infty$  is the steady-state value of the corresponding variable.  $I_{Na}$ , sodium current;  $I_{Kd}$ , delayed rectifier (potassium);  $I_{Nap}$ , persistent sodium;

$I_{\text{AHP}}$ , calcium-dependent potassium current;  $I_{\text{L}}$ , L-type calcium current; and  $I_{\text{A}}$ , A channel.
