# Supplementary material
Source: PubMed Central journal article supplement (PMC2042210)
Supplement: pnas_0707853104_4.pdf [file pnas_0707853104_4.pdf]

## SI Text

### Appendix 1. Modeling L4-to-L2/3 synaptic connection

The synaptic current was simulated as

$$I_{syn} = g_{syn}(t, V) * (V - E_{syn}) , \quad [1]$$

where  $g_{syn}(t, V)$  is the synaptic conductance change, and  $E_{syn}$  is the reversal potential for the synaptic current.

The conductance change for both the AMPA and NMDA components is modeled as

$$g_{syn}(t, V) = B * g_{max} * N * (\exp(-t/\tau_2) - \exp(-t/\tau_1)) , \quad [2]$$

where  $g_{max}$  is the peak conductance, and  $N$  is a normalization factor given by

$$N = \frac{1}{\exp(-t_{peak}/\tau_2) - \exp(-t_{peak}/\tau_1)} \quad [3]$$

So that when  $t = t_{peak}$ ,  $g_{syn} = g_{max}$

$t_{peak}$  (the time to peak of the synaptic conductance) is

$$t_{peak} = \frac{\tau_1 * \tau_2}{\tau_2 - \tau_1} * \log \frac{\tau_2}{\tau_1} , \quad [4]$$

for the AMPA component,  $B = 1$ , whereas for the NMDA component

$$B = \frac{1}{(1 + \exp(0.00062/mV * (-V))) * ([Mg^{+2}]/3.57(mM))} , \quad [5]$$

where  $[Mg^{2+}]$  is extracellular concentration of  $Mg^{2+}$  ions and was taken to be 1 mM (1, 2).

## **Appendix 2. Nonlinear properties of L2/3 modeled neurons**

The Hodgkin and Huxley (3) formalism was used for describing the voltage-gated channels.

For the  $Ca^{2+}$ -dependent potassium channel, the change in intracellular calcium concentration  $[Ca^{2+}]_i$  was modeled as

$$\frac{d[Ca^{2+}]}{dt} = \frac{I_{Ca}}{\tau_a} - \frac{[Ca^{2+}]}{\tau_b}, \quad [1]$$

where  $\tau_a$  is the time constant for calcium buffering [ $\tau_a = 21$  in units of  $1/(mM/ms/mA)$ ],  $I_{Ca}$  is L-type calcium current, and  $\tau_b$  is the time constant ( $\tau_b = 107$  ms) of  $Ca^{2+}$  diffusion.

1. Destexhe A, Mainen ZF, Sejnowski TJ (1994) *J Comput Neurosci* 1:195-230.
2. Zador A, Koch C, Brown TH (1990) *Proc Natl Acad Sci USA* 87:6718-22.
3. Hodgkin AL, Huxley AF (1952) *J Physiol* 117:500-44.
